# Supplementary material for: Beyond carbon: LMIC exports embed 27× greater ecological harm than HICs
Source: Research Square preprint supplement (doi:10.21203/rs.3.rs-6997348/v1), 2025-07-03
Supplement: Supplementary file 1 [file 161226c59dd321d2e0a61c52.docx]

Supplementary Table 1

| Country classification into HIC and LMIC | | | |
| --- | --- | --- | --- |
| **HIC** |  | **LMIC** |  |
| Austria | AT | China | CN |
| Belgium | BE | Brazil | BR |
| Cyprus | CY | India | IN |
| Czech Republic | CZ | Mexico | MX |
| Germany | DE | Turkey | TR |
| Denmark | DK | Indonesia | ID |
| Estonia | EE | South Africa | ZA |
| Spain | ES | RoW Asia and Pacific | WA |
| Finland | FI | RoW America | WL |
| France | FR | RoW Africa | WF |
| Greece | GR |  |  |
| Ireland | IE |  |  |
| Italy | IT |  |  |
| Luxembourg | LU |  |  |
| Latvia | LV |  |  |
| Malta | MT |  |  |
| Netherlands | NL |  |  |
| Israel | IS |  |  |
| Portugal | PT |  |  |
| Sweden | SE |  |  |
| Slovenia | SI |  |  |
| Slovak Republic | SK |  |  |
| United Kingdom | GB |  |  |
| United States | US |  |  |
| Japan | JP |  |  |
| Canada | CA |  |  |
| South Korea | KR |  |  |
| Australia | AU |  |  |
| Switzerland | CH |  |  |
| Taiwan | TW |  |  |
| Norway | NO |  |  |

**Supplementary Table 2.** Mapping of major export products to corresponding EXIOBASE 3.8.2 environmentally extended input–output sectors, based on trade share data from Harvard’s Atlas of Economic Complexity (2021). The listed products account for about half of total exports in each macro-region (Global North and Global South). HIC = high-income countries. LMIC = low- and middle-income countries.

| **Export Product** | **Of total HIC exports (%)** | **Of total LMIC exports (%)** | **Mapped EEMRIO Sector** |
| --- | --- | --- | --- |
| Business services | 25.23 | 12.20 | Other business activities |
| Insurance | 7.30 | — | Insurance and pension funding, except compulsory social security |
| Crude petroleum oils and gases | 3.54 | 12.57 | Extraction of crude petroleum and services related to crude oil extraction |
| Refined petroleum oils | 2.99 | — | Petroleum refinery |
| Cars | 2.27 | 3.75 | Manufacture of motor vehicles, trailers and semi-trailers |
| Packaged medicaments | 2.56 | — | Chemicals nec |
| Serums | 2.28 | — | Chemicals nec |
| Travel & tourism | 2.63 | 3.73 | Hotels and restaurants |
| Electronic parts / motors | 1.56 | — | Manufacture of electrical machinery and apparatus |
| Gold | — | 3.37 | Mining of precious metal ores and concentrates |
| Platinum | — | 0.81 | Mining of precious metal ores and concentrates |
| Iron ore | — | 2.19 | Mining of iron ores |
| Soy | — | 2.09 | Cultivation of vegetables, fruit, nuts |
| Copper ore and refined copper | — | 2.64 | Mining of copper ores and concentrates / Copper production |
| Diamonds | — | 1.02 | Mining of precious metal ores and concentrates |
| **Total (Covered)** | **50.45%** | **44.37%** |  |
